# Supplementary material for: Bacteria from the endosphere and rhizosphere of Quercus spp. use mainly cell wall-associated enzymes to decompose organic matter
Source: PubMed Central journal article supplement (PMC6433265; doi:10.1371/journal.pone.0214422), 2019-03-25
Supplement: pone.0214422.s001.pdf [file pone.0214422.s001.pdf]

**S1 Table. Position and main characteristics of the experimental areas.**

| <b>Site</b> | <b>Location</b>                       | <b>Altitude (masl)</b> | <b>Site description</b>                                                                                                                | <b>Orientation</b> | <b>References</b>                                                          |
|-------------|---------------------------------------|------------------------|----------------------------------------------------------------------------------------------------------------------------------------|--------------------|----------------------------------------------------------------------------|
| <b>HAF1</b> | N 36° 57' 11.2'',<br>W 03° 26' 21.0'' | 1778                   | Natural, mature forest of <i>Quercus pyrenaica</i> Willd. (melojo oak) located at the <b>Highest Altitudinal limit of the Forest</b>   | South facing       | Cobo-Díaz <i>et al.</i> , 2015                                             |
| <b>BOF1</b> | N 36° 57' 26'',<br>W 3° 27' 48''      | 1566                   | <b>Burned</b> <i>Quercus ilex</i> subsp. ballota (evergreen holm Oak) <b>Forest</b> covered by re-growing oak trees after the wildfire | South facing       | Cobo-Díaz <i>et al.</i> , 2015;<br>Fernández-González <i>et al.</i> , 2017 |
| <b>NPF1</b> | N 36° 58' 23.4'',<br>W 03° 24' 36.4'' | 1887                   | <b>Pine forest</b> which was thinned out and <b>naturalized</b> by planting <i>Q. pyrenaica</i> plantlets                              | South facing       | This work                                                                  |

*masl*, meters above the sea level
