# Supplementary material for: Bacteria from the endosphere and rhizosphere of Quercus spp. use mainly cell wall-associated enzymes to decompose organic matter
Source: PubMed Central journal article supplement (PMC6433265; doi:10.1371/journal.pone.0214422), 2019-03-25
Supplement: pone.0214422.s002.pdf [file pone.0214422.s002.pdf]

**S2 Table. Identification of the strains studied based on their partial 16S rRNA gene sequence.** The identity of the closest hit for each strain is indicated, and in some cases, several hits are reported for those strains which showed the same similarity percentage with different species.

| Strain <sup>a</sup> | Accession number (query) | Most similar classified strain                    | Accession number [best hit(s)] | Similarity (%) |
|---------------------|--------------------------|---------------------------------------------------|--------------------------------|----------------|
| L1                  | MK559965                 | <i>Luteibacter rhizovicinus</i> LJ96 <sup>T</sup> | CP017480                       | 100.00         |
| L3                  | MK559965                 |                                                   |                                |                |
| L5                  | MK559965                 |                                                   |                                |                |
| L6                  | MK559965                 |                                                   |                                |                |
| L7                  | MK559965                 |                                                   |                                |                |
| L8                  | MK559965                 |                                                   |                                |                |
| L9                  | MK559965                 |                                                   |                                |                |
| L10                 | MK559965                 |                                                   |                                |                |
| L12                 | MK559965                 |                                                   |                                |                |
| L13                 | MK559965                 |                                                   |                                |                |
| L14                 | MK559965                 |                                                   |                                |                |
| L15                 | MK559965                 |                                                   |                                |                |
| L18                 | MK559965                 |                                                   |                                |                |
| L22                 | MK559965                 |                                                   |                                |                |
| L20                 | MK559963                 | <i>Luteibacter rhizovicinus</i> LJ96 <sup>T</sup> | CP017480                       | 99.80          |
| L21                 | MK559964                 |                                                   |                                |                |
| L50                 | MK559966                 | <i>Luteibacter rhizovicinus</i> LJ96 <sup>T</sup> | CP017480                       | 99.87          |
| p1                  | MK559906                 | <i>Pseudomonas koreensis</i> PgBE56               | MH144278                       | 98.92          |
|                     |                          | <i>Pseudomonas fluorescens</i> LBUM677            | MG461479                       | 98.92          |
|                     |                          | <i>Pseudomonas moraviensis</i> I5-6               | KU229982                       | 98.92          |
| p2                  | MK559907                 | <i>Pseudomonas mandelii</i> YF11-3(1)             | MH144323                       | 99.93          |
| p3                  | MK559908                 | <i>Pseudomonas koreensis</i> PgBE36               | MH144259                       | 99.00          |
|                     |                          | <i>Pseudomonas fluorescens</i> LBUM677            | MG461479                       | 99.00          |
| p4                  | MK559909                 | <i>Pseudomonas koreensis</i> PgBE36               | MH144259                       | 99.00          |
|                     |                          | <i>Pseudomonas fluorescens</i> LBUM677            | MG461479                       | 99.00          |
| p7                  | MK559910                 | <i>Pseudomonas koreensis</i> PgBE36               | MH144259                       | 99.00          |
|                     |                          | <i>Pseudomonas fluorescens</i> LBUM677            | MG461479                       | 99.00          |
| p9                  | MK559913                 | <i>Pseudomonas koreensis</i> PgBE56               | MH144278                       | 98.92          |
|                     |                          | <i>Pseudomonas fluorescens</i> LBUM677            | MG461479                       | 98.92          |
| p10                 | MK559914                 | <i>Pseudomonas koreensis</i> PgBE36               | MH144259                       | 99.00          |
|                     |                          | <i>Pseudomonas fluorescens</i> LBUM677            | MG461479                       | 99.00          |
| p11                 | MK559915                 | <i>Pseudomonas koreensis</i> B16-237              | MK072686                       | 98.99          |
|                     |                          | <i>Pseudomonas fluorescens</i> LBUM677            | MG461479                       | 98.99          |
| p12                 | MK559917                 | <i>Pseudomonas koreensis</i> PgBE36               | MH144259                       | 99.11          |
|                     |                          | <i>Pseudomonas fluorescens</i> LBUM677            | MG461479                       | 99.11          |
| p13                 | MK559919                 | <i>Pseudomonas granadensis</i> PMK4               | MH266421                       | 99.93          |
|                     |                          | <i>Pseudomonas fluorescens</i> CREA-C16           | CP017951                       | 99.93          |
| p14                 | MK559921                 | <i>Pseudomonas koreensis</i> PgBE56               | MH144278                       | 98.87          |

|            |          |                                            |          |        |
|------------|----------|--------------------------------------------|----------|--------|
|            |          | <i>Pseudomonas fluorescens</i> LBUM677     | MG461479 | 98.87  |
|            |          | <i>Pseudomonas moraviensis</i> I5-6        | KU229982 | 98.87  |
| <b>p15</b> | MK559922 | <i>Pseudomonas koreensis</i> PgBE56        | MH144278 | 98.85  |
|            |          | <i>Pseudomonas fluorescens</i> LBUM677     | MG461479 | 98.85  |
|            |          | <i>Pseudomonas moraviensis</i> I5-6        | KU229982 | 98.85  |
| <b>p16</b> | MK559923 | <i>Pseudomonas koreensis</i> B16-237       | MK072686 | 99.07  |
|            |          | <i>Pseudomonas fluorescens</i> LBUM677     | MG461479 | 99.07  |
| <b>p17</b> | MK559924 | <i>Pseudomonas granadensis</i> PMK4        | MH266421 | 99.93  |
|            |          | <i>Pseudomonas fluorescens</i> CREA-C16    | CP017951 | 99.93  |
| <b>p18</b> | MK559925 | <i>Pseudomonas koreensis</i> PgBE56        | MH144278 | 98.99  |
|            |          | <i>Pseudomonas fluorescens</i> LBUM677     | MG461479 | 98.99  |
|            |          | <i>Pseudomonas moraviensis</i> I5-6        | KU229982 | 98.99  |
| <b>p19</b> | MK559927 | <i>Pseudomonas azotoformans</i> ICMP 14360 | MK356438 | 99.93  |
|            |          | <i>Pseudomonas libanensis</i> DMSP-1       | CP034425 | 99.93  |
|            |          | <i>Pseudomonas gessardii</i> 4G497         | MG972901 | 99.93  |
| <b>p20</b> | MK559929 | <i>Pseudomonas koreensis</i> PgBE56        | MH144278 | 98.92  |
|            |          | <i>Pseudomonas fluorescens</i> LBUM677     | MG461479 | 98.92  |
|            |          | <i>Pseudomonas moraviensis</i> I5-6        | KU229982 | 98.92  |
| <b>p23</b> | MK559930 | <i>Pseudomonas lutea</i> BG8               | KJ997740 | 99.92  |
| <b>p24</b> | MK559931 | <i>Pseudomonas koreensis</i> PgBE56        | MH144278 | 98.92  |
|            |          | <i>Pseudomonas fluorescens</i> LBUM677     | MG461479 | 98.92  |
|            |          | <i>Pseudomonas moraviensis</i> I5-6        | KU229982 | 98.92  |
| <b>p25</b> | MK559932 | <i>Pseudomonas granadensis</i> PMK4        | MH266421 | 99.93  |
|            |          | <i>Pseudomonas fluorescens</i> CREA-C16    | CP017951 | 99.93  |
| <b>p30</b> | MK559933 | <i>Pseudomonas granadensis</i> PMK4        | MH266421 | 99.86  |
|            |          | <i>Pseudomonas fluorescens</i> CREA-C16    | CP017951 | 99.86  |
|            |          | <i>Pseudomonas reinekei</i> SN21           | KC790314 | 99.86  |
| <b>p31</b> | MK559934 | <i>Pseudomonas granadensis</i> PMK4        | MH266421 | 99.93  |
|            |          | <i>Pseudomonas fluorescens</i> CREA-C16    | CP017951 | 99.93  |
| <b>p33</b> | MK559935 | <i>Pseudomonas granadensis</i> PMK4        | MH266421 | 99.92  |
|            |          | <i>Pseudomonas fluorescens</i> CREA-C16    | CP017951 | 99.92  |
| <b>p34</b> | MK559936 | <i>Pseudomonas koreensis</i> F9-9          | KT382238 | 99.00  |
| <b>p36</b> | MK559937 | <i>Pseudomonas granadensis</i> PMK4        | MH266421 | 99.93  |
|            |          | <i>Pseudomonas fluorescens</i> CREA-C16    | CP017951 | 99.93  |
| <b>p37</b> | MK559938 | <i>Pseudomonas granadensis</i> PMK4        | MH266421 | 99.93  |
|            |          | <i>Pseudomonas fluorescens</i> CREA-C16    | CP017951 | 99.93  |
| <b>p42</b> | MK559939 | <i>Pseudomonas azotoformans</i> ICMP 14360 | MK356438 | 100.00 |
|            |          | <i>Pseudomonas gessardii</i> 4G497         | MG972901 | 100.00 |
|            |          | <i>Pseudomonas synxantha</i> KGGI14        | MH079449 | 100.00 |
|            |          | <i>Pseudomonas fluorescens</i> YPS3        | MH580200 | 100.00 |
| <b>p43</b> | MK559940 | <i>Pseudomonas azotoformans</i> ICMP 14360 | MK356438 | 100.00 |
|            |          | <i>Pseudomonas gessardii</i> 4G497         | MG972901 | 100.00 |
|            |          | <i>Pseudomonas fluorescens</i> YPS3        | MH580200 | 100.00 |

|                |          |                                                           |           |        |
|----------------|----------|-----------------------------------------------------------|-----------|--------|
| <b>p44</b>     | MK559941 | <i>Pseudomonas granadensis</i> PMK4                       | MH266421  | 100.00 |
|                |          | <i>Pseudomonas fluorescens</i> CREA-C16                   | CP017951  | 100.00 |
| <b>p45</b>     | MK559949 | <i>Pseudomonas granadensis</i> PMK4                       | MH266421  | 99.93  |
|                |          | <i>Pseudomonas fluorescens</i> CREA-C16                   | CP017951  | 99.93  |
| <b>p47</b>     | MK559942 | <i>Pseudomonas koreensis</i> F9-9                         | KT382238  | 98.93  |
|                |          | <i>Pseudomonas fluorescens</i> LBUM677                    | MG461479  | 98.93  |
| <b>p48</b>     | MK559943 | <i>Pseudomonas granadensis</i> PMK4                       | MH266421  | 99.93  |
|                |          | <i>Pseudomonas fluorescens</i> CREA-C16                   | CP017951  | 99.93  |
| <b>p49</b>     | MK559944 | <i>Pseudomonas koreensis</i> PgBE56                       | MH144278  | 98.94  |
|                |          | <i>Pseudomonas fluorescens</i> LBUM677                    | MG461479  | 98.94  |
|                |          | <i>Pseudomonas moraviensis</i> I5-6                       | KU229982  | 98.94  |
| <b>p50</b>     | MK559945 | <i>Pseudomonas koreensis</i> B16-237                      | MK072686  | 98.90  |
|                |          | <i>Pseudomonas fluorescens</i> LBUM677                    | MG461479  | 98.90  |
|                |          | <i>Pseudomonas moraviensis</i> I5-6                       | KU229982  | 98.90  |
| <b>p51</b>     | MK559920 | <i>Pseudomonas koreensis</i> B16-237                      | MK072686  | 99.06  |
|                |          | <i>Pseudomonas fluorescens</i> LBUM677                    | MG461479  | 99.06  |
|                |          | <i>Pseudomonas moraviensis</i> I5-6                       | KU229982  | 99.06  |
| <b>p52</b>     | MK559926 | <i>Pseudomonas koreensis</i> PgBE36                       | MH144259  | 99.00  |
|                |          | <i>Pseudomonas fluorescens</i> LBUM677                    | MG461479  | 99.00  |
| <b>p53</b>     | MK559928 | <i>Pseudomonas mandelii</i> IHB B 10205                   | KR233778  | 100.00 |
| <b>p54</b>     | MK559912 | <i>Pseudomonas helmanticensis</i> 28D7                    | MG269632  | 99.86  |
|                |          | <i>Pseudomonas fluorescens</i> 2F9                        | KT695813  | 99.86  |
| <b>p55</b>     | MK559911 | <i>Pseudomonas helmanticensis</i> 28D7                    | MG269632  | 99.86  |
|                |          | <i>Pseudomonas fluorescens</i> 2F9                        | KT695813  | 99.86  |
| <b>p56</b>     | MK559916 | <i>Pseudomonas granadensis</i> PMK4                       | MH266421  | 99.86  |
|                |          | <i>Pseudomonas fluorescens</i> CREA-C16                   | CP017951  | 99.86  |
|                |          | <i>Pseudomonas reinekei</i> SN21                          | KC790314  | 99.86  |
| <b>p57</b>     | MK559918 | <i>Pseudomonas koreensis</i> PgBE56                       | MH144278  | 98.92  |
|                |          | <i>Pseudomonas fluorescens</i> LBUM677                    | MG461479  | 98.92  |
|                |          | <i>Pseudomonas moraviensis</i> I5-6                       | KU229982  | 98.92  |
| <b>p60</b>     | MK559947 | <i>Pseudomonas migulae</i> HRT13                          | JF778700  | 99.93  |
| <b>p61</b>     | MK559946 | <i>Pseudomonas fluorescens</i> LBUM570                    | MG461471  | 99.93  |
|                |          | <i>Pseudomonas helmanticensis</i> 31A-P4                  | MF062636  | 99.93  |
| <b>p62</b>     | MK559948 | <i>Pseudomonas koreensis</i> PgBE56                       | MH144278  | 98.94  |
|                |          | <i>Pseudomonas fluorescens</i> LBUM677                    | MG461479  | 98.94  |
|                |          | <i>Pseudomonas moraviensis</i> I5-6                       | KU229982  | 98.94  |
| <b>AFG3.2</b>  | KT314126 | <i>Arthrobacter sulfureus</i> DSM 20167 <sup>T</sup>      | NR_026237 | 99.28  |
| <b>AFG7.2</b>  | KT314127 | <i>Arthrobacter phenanthrenivorans</i> Sphe3 <sup>T</sup> | NR_074770 | 99.42  |
| <b>AFG8</b>    | KT314103 | <i>Arthrobacter nitroguajacolicus</i> G2-1 <sup>T</sup>   | NR_027199 | 99.93  |
| <b>AFG15.2</b> | KT314122 | <i>Arthrobacter siccitolerans</i> 4J27 <sup>T</sup>       | NR_108849 | 99.93  |
| <b>AFG16.1</b> | KT314130 | <i>Arthrobacter nitroguajacolicus</i> G2-1 <sup>T</sup>   | NR_027199 | 99.93  |
| <b>AFG17</b>   | KT314108 | <i>Arthrobacter siccitolerans</i> 4J27 <sup>T</sup>       | NR_108849 | 99.49  |
| <b>AFG17.2</b> | KT314152 | <i>Arthrobacter globiformis</i> JCM 1332 <sup>T</sup>     | NR_112192 | 99.71  |

|                |          |                                                         |           |       |
|----------------|----------|---------------------------------------------------------|-----------|-------|
| <b>AFG19.3</b> | KT314147 | <i>Arthrobacter globiformis</i> JCM 1332 <sup>T</sup>   | NR_112192 | 99.71 |
| <b>AFG20</b>   | KT314111 | <i>Arthrobacter globiformis</i> JCM 1332 <sup>T</sup>   | NR_112192 | 99.57 |
| <b>AFG20.1</b> | KT314142 | <i>Arthrobacter globiformis</i> JCM 1332 <sup>T</sup>   | NR_112192 | 99.49 |
| <b>AFG22</b>   | KT314113 | <i>Arthrobacter nitroguajacolicus</i> G2-1 <sup>T</sup> | NR_027199 | 99.86 |
| <b>AFG27.1</b> | KT314139 | <i>Arthrobacter globiformis</i> JCM 1332 <sup>T</sup>   | NR_112192 | 99.49 |
