# Supplementary material for: Bacteria from the endosphere and rhizosphere of Quercus spp. use mainly cell wall-associated enzymes to decompose organic matter
Source: PubMed Central journal article supplement (PMC6433265; doi:10.1371/journal.pone.0214422), 2019-03-25
Supplement: pone.0214422.s003.pdf [file pone.0214422.s003.pdf]

**S3 Table. Activity of cell-wall bound and freely-released enzymes produced by genera *Luteibacter*, *Pseudomonas* and *Arthrobacter* isolated from the root endosphere or the rhizosphere of *Quercus* spp. trees.** Data represent means and standard deviations of activities of those enzymes produced by two or more strains. A '-' indicates values below detection limit. An '\*' indicates values that were recorded just for one strain, the one which is shown in parentheses. Abbreviations of enzymes: **bG**:  $\beta$ -glucosidase; **Pho**: acid phosphatase; **Lip**: lipase; **bM**:  $\beta$ -mannosidase; **aA**:  $\alpha$ -arabinosidase; **bX**:  $\beta$ -xylosidase; **bGal**:  $\beta$ -galactosidase; **CBH**: cellobiohydrolase; **aG**:  $\alpha$ -glucosidase; **ChTN**: chitinase; **aGal**:  $\alpha$ -galactosidase; **bGlu**:  $\beta$ -glucuronidase. For each bacterial genus, significant differences between the activity of those enzymes detected in both fractions were calculated by using the non-parametric Mann-Whitney U test at a confidence level of 95%.

|             | Activity (nM min <sup>-1</sup> mL <sup>-1</sup> ) |            |                       |                    |             |                        |                     |              |         |
|-------------|---------------------------------------------------|------------|-----------------------|--------------------|-------------|------------------------|---------------------|--------------|---------|
|             | <i>Luteibacter</i>                                |            |                       | <i>Pseudomonas</i> |             |                        | <i>Arthrobacter</i> |              |         |
|             | Bound                                             | Free       | P value               | Bound              | Free        | P value                | Bound               | Free         | P value |
| <b>bG</b>   | 4152 ± 250                                        | 17 ± 9     | 0.028                 | 203 ± 297          | 104 ± 95    | 0.216                  | 18* (AFG15.2)       | 32 ± 16      |         |
| <b>Pho</b>  | 5240 ± 364                                        | 128 ± 58   | 7.05·10 <sup>-7</sup> | 2729 ± 2105        | 1172 ± 1300 | 7.86·10 <sup>-6</sup>  | 57 ± 75             | 22 ± 8       | 0.490   |
| <b>Lip</b>  | 5415 ± 343                                        | 3134 ± 468 | 7.05·10 <sup>-7</sup> | 5451 ± 907         | 3287 ± 1235 | 8.96·10 <sup>-12</sup> | 308 ± 325           | 316 ± 300    | 0.977   |
| <b>bM</b>   | 874 ± 149                                         | 10* (L50)  |                       | 12* (p23)          | 42 ± 44     |                        | -                   | -            |         |
| <b>aA</b>   | 26 ± 6                                            | -          |                       | -                  | 44 ± 68     |                        | 14 ± 1              | -            |         |
| <b>bX</b>   | 104 ± 14                                          | -          |                       | 30 ± 12            | 43 ± 46     | 0.896                  | 11* (AFG15.2)       | 28* (AFG7.2) |         |
| <b>bGal</b> | 1163 ± 195                                        | -          |                       | -                  | 42 ± 54     |                        | 188 ± 151           | 73 ± 87      | 0.105   |
| <b>CBH</b>  | 130 ± 24                                          | -          |                       | 30* (p23)          | 44 ± 47     |                        | -                   | -            |         |
| <b>aG</b>   | 594 ± 230                                         | -          |                       | 10* (p20)          | 39 ± 44     |                        | -                   | 66 ± 99      |         |
| <b>ChTN</b> | 11 ± 1                                            | -          |                       | -                  | 44 ± 52     |                        | 63 ± 8              | 13* (AFG22)  |         |
| <b>aGal</b> | 587 ± 92                                          | -          |                       | -                  | 124 ± 243   |                        | -                   | 15 ± 4       |         |
| <b>bGlu</b> | -                                                 | -          |                       | -                  | 41 ± 41     |                        | -                   | 87 ± 154     |         |
