# Supplementary material for: Bacteria from the endosphere and rhizosphere of Quercus spp. use mainly cell wall-associated enzymes to decompose organic matter
Source: PubMed Central journal article supplement (PMC6433265; doi:10.1371/journal.pone.0214422), 2019-03-25
Supplement: pone.0214422.s004.pdf [file pone.0214422.s004.pdf]

**S4 Table. Activity of cell-bound and freely-released enzymes, and total enzymatic activity of strains of genus *Luteibacter*.** Data represent means and standard deviations of the total activity of three replicates. Abbreviations of enzymes: **bG**:  $\beta$ -glucosidase; **Pho**: acid phosphatase; **Lip**: lipase; **bM**:  $\beta$ -mannosidase; **aA**:  $\alpha$ -arabinosidase; **bX**:  $\beta$ -xylosidase; **bGal**:  $\beta$ -galactosidase; **CBH**: cellobiohydrolase; **aG**:  $\alpha$ -glucosidase; **ChTN**: chitinase; **aGal**:  $\alpha$ -galactosidase; **bGlu**:  $\beta$ -glucuronidase. A ‘-’ indicates values below detection limit.

| Strain:     | L1                                                         |           |          | Strain:              | L3                                                         |           |          | Strain:              | L5                                                         |           |          |
|-------------|------------------------------------------------------------|-----------|----------|----------------------|------------------------------------------------------------|-----------|----------|----------------------|------------------------------------------------------------|-----------|----------|
|             | Total activity<br>(nM min <sup>-1</sup> mL <sup>-1</sup> ) | Bound (%) | Free (%) |                      | Total activity<br>(nM min <sup>-1</sup> mL <sup>-1</sup> ) | Bound (%) | Free (%) |                      | Total activity<br>(nM min <sup>-1</sup> mL <sup>-1</sup> ) | Bound (%) | Free (%) |
| <b>bG</b>   | 3905 ± 88                                                  | 100       | -        | <b>bG</b>            | 3832 ± 109                                                 | 100       | -        | <b>bG</b>            | 4030 ± 147                                                 | 100       | -        |
| <b>Pho</b>  | 5208 ± 141                                                 | 97        | 3        | <b>Pho</b>           | 5013 ± 168                                                 | 97        | 3        | <b>Pho</b>           | 5202 ± 201                                                 | 98        | 2        |
| <b>Lip</b>  | 7823 ± 354                                                 | 64        | 36       | <b>Lip</b>           | 8021 ± 59                                                  | 60        | 40       | <b>Lip</b>           | 8312 ± 53                                                  | 61        | 39       |
| <b>bM</b>   | 675 ± 113                                                  | 100       | -        | <b>bM</b>            | 848 ± 69                                                   | 100       | -        | <b>bM</b>            | 825 ± 37                                                   | 100       | -        |
| <b>aA</b>   | 16 ± 1                                                     | 100       | -        | <b>aA</b>            | 28 ± 1                                                     | 100       | -        | <b>aA</b>            | 31 ± 1                                                     | 100       | -        |
| <b>bX</b>   | 82 ± 5                                                     | 100       | -        | <b>bX</b>            | 105 ± 7                                                    | 100       | -        | <b>bX</b>            | 104 ± 9                                                    | 100       | -        |
| <b>bGal</b> | 910 ± 23                                                   | 100       | -        | <b>bGal</b>          | 1174 ± 27                                                  | 100       | -        | <b>bGal</b>          | 1286 ± 50                                                  | 100       | -        |
| <b>CBH</b>  | 98 ± 5                                                     | 100       | -        | <b>CBH</b>           | 131 ± 4                                                    | 100       | -        | <b>CBH</b>           | 146 ± 8                                                    | 100       | -        |
| <b>aG</b>   | 377 ± 51                                                   | 100       | -        | <b>aG</b>            | 600 ± 82                                                   | 100       | -        | <b>aG</b>            | 977 ± 128                                                  | 100       | -        |
| <b>ChTN</b> | -                                                          | -         | -        | <b>ChTN</b>          | -                                                          | -         | -        | <b>ChTN</b>          | 11 ± 1                                                     | 100       | -        |
| <b>aGal</b> | 421 ± 6                                                    | 100       | -        | <b>aGal</b>          | 564 ± 4                                                    | 100       | -        | <b>aGal</b>          | 634 ± 5                                                    | 100       | -        |
| <b>bGlu</b> | -                                                          | -         | -        | <b>bGlu</b>          | -                                                          | -         | -        | <b>bGlu</b>          | -                                                          | -         | -        |
|             | Enzymes produced (%)                                       |           | 83.3     | Enzymes produced (%) |                                                            | 83.3      |          | Enzymes produced (%) |                                                            | 91.7      |          |
| Strain:     | L6                                                         |           |          | Strain:              | L7                                                         |           |          | Strain:              | L8                                                         |           |          |
|             | Total activity<br>(nM min <sup>-1</sup> mL <sup>-1</sup> ) | Bound (%) | Free (%) |                      | Total activity<br>(nM min <sup>-1</sup> mL <sup>-1</sup> ) | Bound (%) | Free (%) |                      | Total activity<br>(nM min <sup>-1</sup> mL <sup>-1</sup> ) | Bound (%) | Free (%) |
| <b>bG</b>   | 4123 ± 293                                                 | 100       | -        | <b>bG</b>            | 4039 ± 214                                                 | 100       | -        | <b>bG</b>            | 4042 ± 125                                                 | 100       | -        |
| <b>Pho</b>  | 5030 ± 272                                                 | 99        | 1        | <b>Pho</b>           | 5668 ± 224                                                 | 98        | 2        | <b>Pho</b>           | 5110 ± 89                                                  | 98        | 2        |
| <b>Lip</b>  | 8794 ± 201                                                 | 61        | 39       | <b>Lip</b>           | 10003 ± 61                                                 | 54        | 46       | <b>Lip</b>           | 8643 ± 173                                                 | 64        | 36       |
| <b>bM</b>   | 943 ± 137                                                  | 100       | -        | <b>bM</b>            | 880 ± 72                                                   | 100       | -        | <b>bM</b>            | 905 ± 56                                                   | 100       | -        |
| <b>aA</b>   | 29 ± 1                                                     | 100       | -        | <b>aA</b>            | 32 ± 1                                                     | 100       | -        | <b>aA</b>            | 27 ± 2                                                     | 100       | -        |
| <b>bX</b>   | 110 ± 12                                                   | 100       | -        | <b>bX</b>            | 107 ± 10                                                   | 100       | -        | <b>bX</b>            | 115 ± 10                                                   | 100       | -        |
| <b>bGal</b> | 1274 ± 56                                                  | 100       | -        | <b>bGal</b>          | 1349 ± 89                                                  | 100       | -        | <b>bGal</b>          | 1239 ± 53                                                  | 100       | -        |
| <b>CBH</b>  | 146 ± 10                                                   | 100       | -        | <b>CBH</b>           | 157 ± 13                                                   | 100       | -        | <b>CBH</b>           | 145 ± 8                                                    | 100       | -        |
| <b>aG</b>   | 875 ± 123                                                  | 100       | -        | <b>aG</b>            | 965 ± 113                                                  | 100       | -        | <b>aG</b>            | 619 ± 49                                                   | 100       | -        |
| <b>ChTN</b> | -                                                          | -         | -        | <b>ChTN</b>          | 11 ± 1                                                     | 100       | -        | <b>ChTN</b>          | -                                                          | -         | -        |
| <b>aGal</b> | 639 ± 8                                                    | 100       | -        | <b>aGal</b>          | 619 ± 14                                                   | 100       | -        | <b>aGal</b>          | 610 ± 1                                                    | 100       | -        |
| <b>bGlu</b> | -                                                          | -         | -        | <b>bGlu</b>          | -                                                          | -         | -        | <b>bGlu</b>          | -                                                          | -         | -        |
|             | Enzymes produced (%)                                       |           | 83.3     | Enzymes produced (%) |                                                            | 91.7      |          | Enzymes produced (%) |                                                            | 83.3      |          |

| Strain:     | L9                                                         |           |             | Strain:     | L10                                                        |           |             | Strain:     | L12                                                        |           |             |
|-------------|------------------------------------------------------------|-----------|-------------|-------------|------------------------------------------------------------|-----------|-------------|-------------|------------------------------------------------------------|-----------|-------------|
|             | Total activity<br>(nM min <sup>-1</sup> mL <sup>-1</sup> ) | Bound (%) | Free (%)    |             | Total activity<br>(nM min <sup>-1</sup> mL <sup>-1</sup> ) | Bound (%) | Free (%)    |             | Total activity<br>(nM min <sup>-1</sup> mL <sup>-1</sup> ) | Bound (%) | Free (%)    |
| <b>bG</b>   | 4397 ± 209                                                 | 100       | -           | <b>bG</b>   | 4466 ± 158                                                 | 100       | -           | <b>bG</b>   | 4031 ± 86                                                  | 100       | -           |
| <b>Pho</b>  | 5462 ± 216                                                 | 98        | 2           | <b>Pho</b>  | 5316 ± 153                                                 | 98        | 2           | <b>Pho</b>  | 4988 ± 51                                                  | 97        | 3           |
| <b>Lip</b>  | 8847 ± 72                                                  | 66        | 34          | <b>Lip</b>  | 8701 ± 111                                                 | 64        | 36          | <b>Lip</b>  | 8160 ± 94                                                  | 63        | 37          |
| <b>bM</b>   | 951 ± 79                                                   | 100       | -           | <b>bM</b>   | 1002 ± 102                                                 | 100       | -           | <b>bM</b>   | 877 ± 126                                                  | 100       | -           |
| <b>aA</b>   | 30 ± 1                                                     | 100       | -           | <b>aA</b>   | 29 ± 0                                                     | 100       | -           | <b>aA</b>   | 21 ± 1                                                     | 100       | -           |
| <b>bX</b>   | 126 ± 17                                                   | 100       | -           | <b>bX</b>   | 129 ± 16                                                   | 100       | -           | <b>bX</b>   | 96 ± 8                                                     | 100       | -           |
| <b>bGal</b> | 1302 ± 77                                                  | 100       | -           | <b>bGal</b> | 1277 ± 71                                                  | 100       | -           | <b>bGal</b> | 986 ± 41                                                   | 100       | -           |
| <b>CBH</b>  | 156 ± 14                                                   | 100       | -           | <b>CBH</b>  | 157 ± 14                                                   | 100       | -           | <b>CBH</b>  | 117 ± 6                                                    | 100       | -           |
| <b>aG</b>   | 738 ± 146                                                  | 100       | -           | <b>aG</b>   | 747 ± 113                                                  | 100       | -           | <b>aG</b>   | 477 ± 88                                                   | 100       | -           |
| <b>ChTN</b> | 11 ± 3                                                     | 100       | -           | <b>ChTN</b> | 13 ± 1                                                     | 100       | -           | <b>ChTN</b> | -                                                          | -         | -           |
| <b>aGal</b> | 659 ± 7                                                    | 100       | -           | <b>aGal</b> | 671 ± 4                                                    | 100       | -           | <b>aGal</b> | 554 ± 4                                                    | 100       | -           |
| <b>bGlu</b> | -                                                          | -         | -           | <b>bGlu</b> | -                                                          | -         | -           | <b>bGlu</b> | -                                                          | -         | -           |
|             | <b>Enzymes produced (%)</b>                                |           | <b>91.7</b> |             | <b>Enzymes produced (%)</b>                                |           | <b>91.7</b> |             | <b>Enzymes produced (%)</b>                                |           | <b>83.3</b> |
| Strain:     | L13                                                        |           |             | Strain:     | L14                                                        |           |             | Strain:     | L15                                                        |           |             |
|             | Total activity<br>(nM min <sup>-1</sup> mL <sup>-1</sup> ) | Bound (%) | Free (%)    |             | Total activity<br>(nM min <sup>-1</sup> mL <sup>-1</sup> ) | Bound (%) | Free (%)    |             | Total activity<br>(nM min <sup>-1</sup> mL <sup>-1</sup> ) | Bound (%) | Free (%)    |
| <b>bG</b>   | 4004 ± 58                                                  | 100       | -           | <b>bG</b>   | 4743 ± 168                                                 | 99        | 1           | <b>bG</b>   | 3856 ± 38                                                  | 99        | 1           |
| <b>Pho</b>  | 4883 ± 17                                                  | 98        | 2           | <b>Pho</b>  | 6305 ± 165                                                 | 97        | 3           | <b>Pho</b>  | 5267 ± 89                                                  | 95        | 5           |
| <b>Lip</b>  | 7757 ± 235                                                 | 67        | 33          | <b>Lip</b>  | 8741 ± 45                                                  | 66        | 34          | <b>Lip</b>  | 8574 ± 159                                                 | 59        | 41          |
| <b>bM</b>   | 850 ± 111                                                  | 100       | -           | <b>bM</b>   | 1238 ± 162                                                 | 100       | -           | <b>bM</b>   | 610 ± 54                                                   | 100       | -           |
| <b>aA</b>   | 22 ± 1                                                     | 100       | -           | <b>aA</b>   | -                                                          | -         | -           | <b>aA</b>   | 18 ± 2                                                     | 100       | -           |
| <b>bX</b>   | 94 ± 8                                                     | 100       | -           | <b>bX</b>   | 82 ± 7                                                     | 100       | -           | <b>bX</b>   | 91 ± 7                                                     | 100       | -           |
| <b>bGal</b> | 955 ± 30                                                   | 100       | -           | <b>bGal</b> | 1329 ± 48                                                  | 100       | -           | <b>bGal</b> | 848 ± 14                                                   | 100       | -           |
| <b>CBH</b>  | 110 ± 6                                                    | 100       | -           | <b>CBH</b>  | 116 ± 11                                                   | 100       | -           | <b>CBH</b>  | 96 ± 4                                                     | 100       | -           |
| <b>aG</b>   | 446 ± 83                                                   | 100       | -           | <b>aG</b>   | 611 ± 34                                                   | 100       | -           | <b>aG</b>   | 267 ± 29                                                   | 100       | -           |
| <b>ChTN</b> | -                                                          | -         | -           | <b>ChTN</b> | -                                                          | -         | -           | <b>ChTN</b> | -                                                          | -         | -           |
| <b>aGal</b> | 543 ± 8                                                    | 100       | -           | <b>aGal</b> | 716 ± 13                                                   | 100       | -           | <b>aGal</b> | 409 ± 9                                                    | 100       | -           |
| <b>bGlu</b> | -                                                          | -         | -           | <b>bGlu</b> | -                                                          | -         | -           | <b>bGlu</b> | -                                                          | -         | -           |
|             | <b>Enzymes produced (%)</b>                                |           | <b>83.3</b> |             | <b>Enzymes produced (%)</b>                                |           | <b>75</b>   |             | <b>Enzymes produced (%)</b>                                |           | <b>83.3</b> |

| Strain:     | L18                                                        |           |             | Strain:     | L20                                                        |           |             | Strain:     | L21                                                        |           |             |
|-------------|------------------------------------------------------------|-----------|-------------|-------------|------------------------------------------------------------|-----------|-------------|-------------|------------------------------------------------------------|-----------|-------------|
|             | Total activity<br>(nM min <sup>-1</sup> mL <sup>-1</sup> ) | Bound (%) | Free (%)    |             | Total activity<br>(nM min <sup>-1</sup> mL <sup>-1</sup> ) | Bound (%) | Free (%)    |             | Total activity<br>(nM min <sup>-1</sup> mL <sup>-1</sup> ) | Bound (%) | Free (%)    |
| <b>bG</b>   | 4141 ± 90                                                  | 100       | -           | <b>bG</b>   | 4151 ± 88                                                  | 100       | -           | <b>bG</b>   | 4535 ± 225                                                 | 100       | -           |
| <b>Pho</b>  | 5245 ± 30                                                  | 99        | 1           | <b>Pho</b>  | 5140 ± 52                                                  | 99        | 1           | <b>Pho</b>  | 5932 ± 169                                                 | 97        | 3           |
| <b>Lip</b>  | 8037 ± 190                                                 | 66        | 34          | <b>Lip</b>  | 7971 ± 217                                                 | 67        | 33          | <b>Lip</b>  | 9078 ± 129                                                 | 66        | 34          |
| <b>bM</b>   | 798 ± 102                                                  | 100       | -           | <b>bM</b>   | 640 ± 65                                                   | 100       | -           | <b>bM</b>   | 991 ± 84                                                   | 100       | -           |
| <b>aA</b>   | 20 ± 2                                                     | 100       | -           | <b>aA</b>   | 19 ± 1                                                     | 100       | -           | <b>aA</b>   | 32 ± 1                                                     | 100       | -           |
| <b>bX</b>   | 98 ± 10                                                    | 100       | -           | <b>bX</b>   | 94 ± 9                                                     | 100       | -           | <b>bX</b>   | 121 ± 16                                                   | 100       | -           |
| <b>bGal</b> | 990 ± 40                                                   | 100       | -           | <b>bGal</b> | 893 ± 52                                                   | 100       | -           | <b>bGal</b> | 1407. ± 77                                                 | 100       | -           |
| <b>CBH</b>  | 107 ± 6                                                    | 100       | -           | <b>CBH</b>  | 103 ± 9                                                    | 100       | -           | <b>CBH</b>  | 164 ± 9                                                    | 100       | -           |
| <b>aG</b>   | 363 ± 55                                                   | 100       | -           | <b>aG</b>   | 339 ± 73                                                   | 100       | -           | <b>aG</b>   | 831 ± 276                                                  | 100       | -           |
| <b>ChTN</b> | -                                                          | -         | -           | <b>ChTN</b> | 10 ± 1                                                     | 100       | -           | <b>ChTN</b> | -                                                          | -         | -           |
| <b>aGal</b> | 512 ± 4                                                    | 100       | -           | <b>aGal</b> | 460 ± 0                                                    | 100       | -           | <b>aGal</b> | 687 ± 7                                                    | 100       | -           |
| <b>bGlu</b> | -                                                          | -         | -           | <b>bGlu</b> | -                                                          | -         | -           | <b>bGlu</b> | -                                                          | -         | -           |
|             | <b>Enzymes produced (%)</b>                                |           | <b>83.3</b> |             | <b>Enzymes produced (%)</b>                                |           | <b>91.7</b> |             | <b>Enzymes produced (%)</b>                                |           | <b>83.3</b> |

| Strain:     | L22                                                        |           |             | Strain:     | L50                                                        |           |             |
|-------------|------------------------------------------------------------|-----------|-------------|-------------|------------------------------------------------------------|-----------|-------------|
|             | Total activity<br>(nM min <sup>-1</sup> mL <sup>-1</sup> ) | Bound (%) | Free (%)    |             | Total activity<br>(nM min <sup>-1</sup> mL <sup>-1</sup> ) | Bound (%) | Free (%)    |
| <b>bG</b>   | 4032 ± 149                                                 | 100       | -           | <b>bG</b>   | 4297 ± 184                                                 | 100       | -           |
| <b>Pho</b>  | 5647 ± 81                                                  | 97        | 3           | <b>Pho</b>  | 5839 ± 91                                                  | 98        | 2           |
| <b>Lip</b>  | 8729 ± 174                                                 | 68        | 32          | <b>Lip</b>  | 9143 ± 68                                                  | 62        | 38          |
| <b>bM</b>   | 884 ± 55                                                   | 100       | -           | <b>bM</b>   | 959 ± 49                                                   | 99        | 1           |
| <b>aA</b>   | 25 ± 1                                                     | 100       | -           | <b>aA</b>   | 38 ± 0                                                     | 100       | -           |
| <b>bX</b>   | 96 ± 11                                                    | 100       | -           | <b>bX</b>   | 118 ± 7                                                    | 100       | -           |
| <b>bGal</b> | 1115 ± 55                                                  | 100       | -           | <b>bGal</b> | 1442 ± 49                                                  | 100       | -           |
| <b>CBH</b>  | 116 ± 10                                                   | 100       | -           | <b>CBH</b>  | 149 ± 19                                                   | 100       | -           |
| <b>aG</b>   | 329 ± 78                                                   | 100       | -           | <b>aG</b>   | 541 ± 2                                                    | 100       | -           |
| <b>ChTN</b> | -                                                          | -         | -           | <b>ChTN</b> | 11 ± 3                                                     | 100       | -           |
| <b>aGal</b> | 605 ± 2                                                    | 100       | -           | <b>aGal</b> | 668 ± 4                                                    | 100       | -           |
| <b>bGlu</b> | -                                                          | -         | -           | <b>bGlu</b> | -                                                          | -         | -           |
|             | <b>Enzymes produced (%)</b>                                |           | <b>83.3</b> |             | <b>Enzymes produced (%)</b>                                |           | <b>91.7</b> |
