# Supplementary material for: Bacteria from the endosphere and rhizosphere of Quercus spp. use mainly cell wall-associated enzymes to decompose organic matter
Source: PubMed Central journal article supplement (PMC6433265; doi:10.1371/journal.pone.0214422), 2019-03-25
Supplement: pone.0214422.s005.pdf [file pone.0214422.s005.pdf]

**S5 Table. Activity of cell-bound and freely-released enzymes, and total enzymatic activity of strains of genus *Pseudomonas*.** Data represent means and standard deviations of the total activity of three replicates. Abbreviations of enzymes: **bG**:  $\beta$ -glucosidase; **Pho**: acid phosphatase; **Lip**: lipase; **bM**:  $\beta$ -mannosidase; **aA**:  $\alpha$ -arabinosidase; **bX**:  $\beta$ -xylosidase; **bGal**:  $\beta$ -galactosidase; **CBH**: cellobiohydrolase; **aG**:  $\alpha$ -glucosidase; **ChTN**: chitinase; **aGal**:  $\alpha$ -galactosidase; **bGlu**:  $\beta$ -glucuronidase. A ‘-’ indicates values below detection limit.

| Strain:     | p1                                                         |           |          | Strain:     | p2                                                         |           |          | Strain:     | p3                                                         |           |          |
|-------------|------------------------------------------------------------|-----------|----------|-------------|------------------------------------------------------------|-----------|----------|-------------|------------------------------------------------------------|-----------|----------|
|             | Total activity<br>(nM min <sup>-1</sup> mL <sup>-1</sup> ) | Bound (%) | Free (%) |             | Total activity<br>(nM min <sup>-1</sup> mL <sup>-1</sup> ) | Bound (%) | Free (%) |             | Total activity<br>(nM min <sup>-1</sup> mL <sup>-1</sup> ) | Bound (%) | Free (%) |
| <b>bG</b>   | 327 ± 4                                                    | 75        | 25       | <b>bG</b>   | -                                                          | -         | -        | <b>bG</b>   | 302 ± 3                                                    | 53        | 47       |
| <b>Pho</b>  | 7242 ± 108                                                 | 58        | 42       | <b>Pho</b>  | 4970 ± 149                                                 | 97        | 3        | <b>Pho</b>  | 5750 ± 88                                                  | 52        | 48       |
| <b>Lip</b>  | 7880 ± 105                                                 | 68        | 32       | <b>Lip</b>  | 8213 ± 81                                                  | 64        | 36       | <b>Lip</b>  | 8846 ± 100                                                 | 67        | 33       |
| <b>bM</b>   | -                                                          | -         | -        | <b>bM</b>   | -                                                          | -         | -        | <b>bM</b>   | -                                                          | -         | -        |
| <b>aA</b>   | -                                                          | -         | -        | <b>aA</b>   | -                                                          | -         | -        | <b>aA</b>   | -                                                          | -         | -        |
| <b>bX</b>   | -                                                          | -         | -        | <b>bX</b>   | -                                                          | -         | -        | <b>bX</b>   | -                                                          | -         | -        |
| <b>bGal</b> | -                                                          | -         | -        | <b>bGal</b> | -                                                          | -         | -        | <b>bGal</b> | -                                                          | -         | -        |
| <b>CBH</b>  | -                                                          | -         | -        | <b>CBH</b>  | -                                                          | -         | -        | <b>CBH</b>  | -                                                          | -         | -        |
| <b>aG</b>   | -                                                          | -         | -        | <b>aG</b>   | -                                                          | -         | -        | <b>aG</b>   | -                                                          | -         | -        |
| <b>ChTN</b> | -                                                          | -         | -        | <b>ChTN</b> | -                                                          | -         | -        | <b>ChTN</b> | -                                                          | -         | -        |
| <b>aGal</b> | -                                                          | -         | -        | <b>aGal</b> | 15 ± 1                                                     | -         | 100.00   | <b>aGal</b> | -                                                          | -         | -        |
| <b>bGlu</b> | -                                                          | -         | -        | <b>bGlu</b> | -                                                          | -         | -        | <b>bGlu</b> | -                                                          | -         | -        |
|             | Enzymes produced (%)                                       |           | 25       |             | Enzymes produced (%)                                       |           | 25       |             | Enzymes produced (%)                                       |           | 25       |
| Strain:     | p4                                                         |           |          | Strain:     | p7                                                         |           |          | Strain:     | p9                                                         |           |          |
|             | Total activity<br>(nM min <sup>-1</sup> mL <sup>-1</sup> ) | Bound (%) | Free (%) |             | Total activity<br>(nM min <sup>-1</sup> mL <sup>-1</sup> ) | Bound (%) | Free (%) |             | Total activity<br>(nM min <sup>-1</sup> mL <sup>-1</sup> ) | Bound (%) | Free (%) |
| <b>bG</b>   | 125 ± 4                                                    | 11        | 89       | <b>bG</b>   | -                                                          | -         | -        | <b>bG</b>   | 94 ± 6                                                     | 61        | 39       |
| <b>Pho</b>  | 2297 ± 65                                                  | 17        | 83       | <b>Pho</b>  | 1647 ± 77                                                  | 94        | 6        | <b>Pho</b>  | 3521 ± 157                                                 | 65        | 35       |
| <b>Lip</b>  | 2938 ± 278                                                 | 32        | 68       | <b>Lip</b>  | 8681 ± 117                                                 | 58        | 42       | <b>Lip</b>  | 9614 ± 141                                                 | 68        | 32       |
| <b>bM</b>   | -                                                          | -         | -        | <b>bM</b>   | -                                                          | -         | -        | <b>bM</b>   | 17 ± 3                                                     | -         | 100      |
| <b>aA</b>   | -                                                          | -         | -        | <b>aA</b>   | -                                                          | -         | -        | <b>aA</b>   | 14 ± 1                                                     | -         | 100      |
| <b>bX</b>   | -                                                          | -         | -        | <b>bX</b>   | -                                                          | -         | -        | <b>bX</b>   | 16 ± 3                                                     | -         | 100      |
| <b>bGal</b> | -                                                          | -         | -        | <b>bGal</b> | -                                                          | -         | -        | <b>bGal</b> | 13 ± 3                                                     | -         | 100      |
| <b>CBH</b>  | -                                                          | -         | -        | <b>CBH</b>  | -                                                          | -         | -        | <b>CBH</b>  | 13 ± 1                                                     | -         | 100      |
| <b>aG</b>   | -                                                          | -         | -        | <b>aG</b>   | -                                                          | -         | -        | <b>aG</b>   | 20 ± 3                                                     | -         | 100      |
| <b>ChTN</b> | -                                                          | -         | -        | <b>ChTN</b> | -                                                          | -         | -        | <b>ChTN</b> | -                                                          | -         | -        |
| <b>aGal</b> | 760 ± 22                                                   | -         | 100      | <b>aGal</b> | -                                                          | -         | -        | <b>aGal</b> | 22 ± 1                                                     | -         | 100      |
| <b>bGlu</b> | -                                                          | -         | -        | <b>bGlu</b> | -                                                          | -         | -        | <b>bGlu</b> | 17 ± 2                                                     | -         | 100      |
|             | Enzymes produced (%)                                       |           | 33.3     |             | Enzymes produced (%)                                       |           | 16.7     |             | Enzymes produced (%)                                       |           | 91.7     |

| Strain:     | p10                                                        |           |          | Strain:     | p11                                                        |           |          | Strain:     | p12                                                        |           |          |
|-------------|------------------------------------------------------------|-----------|----------|-------------|------------------------------------------------------------|-----------|----------|-------------|------------------------------------------------------------|-----------|----------|
|             | Total activity<br>(nM min <sup>-1</sup> mL <sup>-1</sup> ) | Bound (%) | Free (%) |             | Total activity<br>(nM min <sup>-1</sup> mL <sup>-1</sup> ) | Bound (%) | Free (%) |             | Total activity<br>(nM min <sup>-1</sup> mL <sup>-1</sup> ) | Bound (%) | Free (%) |
| <b>bG</b>   | 46 ± 2                                                     | 100       | -        | <b>bG</b>   | 160 ± 4                                                    | 56        | 44       | <b>bG</b>   | 132 ± 2                                                    | 58        | 42       |
| <b>Pho</b>  | 6566 ± 138                                                 | 58        | 42       | <b>Pho</b>  | 6440 ± 94                                                  | 37        | 63       | <b>Pho</b>  | 5134 ± 148                                                 | 40        | 60       |
| <b>Lip</b>  | 10838 ± 355                                                | 53        | 47       | <b>Lip</b>  | 10667 ± 361                                                | 53        | 47       | <b>Lip</b>  | 8715 ± 108                                                 | 57        | 43       |
| <b>bM</b>   | -                                                          | -         | -        | <b>bM</b>   | -                                                          | -         | -        | <b>bM</b>   | -                                                          | -         | -        |
| <b>aA</b>   | -                                                          | -         | -        | <b>aA</b>   | -                                                          | -         | -        | <b>aA</b>   | -                                                          | -         | -        |
| <b>bX</b>   | -                                                          | -         | -        | <b>bX</b>   | -                                                          | -         | -        | <b>bX</b>   | -                                                          | -         | -        |
| <b>bGal</b> | -                                                          | -         | -        | <b>bGal</b> | -                                                          | -         | -        | <b>bGal</b> | -                                                          | -         | -        |
| <b>CBH</b>  | -                                                          | -         | -        | <b>CBH</b>  | -                                                          | -         | -        | <b>CBH</b>  | -                                                          | -         | -        |
| <b>aG</b>   | -                                                          | -         | -        | <b>aG</b>   | -                                                          | -         | -        | <b>aG</b>   | -                                                          | -         | -        |
| <b>ChTN</b> | -                                                          | -         | -        | <b>ChTN</b> | -                                                          | -         | -        | <b>ChTN</b> | -                                                          | -         | -        |
| <b>aGal</b> | -                                                          | -         | -        | <b>aGal</b> | -                                                          | -         | -        | <b>aGal</b> | -                                                          | -         | -        |
| <b>bGlu</b> | -                                                          | -         | -        | <b>bGlu</b> | -                                                          | -         | -        | <b>bGlu</b> | -                                                          | -         | -        |
|             | Enzymes produced (%)                                       |           | 25       |             | Enzymes produced (%)                                       |           | 25       |             | Enzymes produced (%)                                       |           | 25       |
| Strain:     | p13                                                        |           |          | Strain:     | p14                                                        |           |          | Strain:     | p15                                                        |           |          |
|             | Total activity<br>(nM min <sup>-1</sup> mL <sup>-1</sup> ) | Bound (%) | Free (%) |             | Total activity<br>(nM min <sup>-1</sup> mL <sup>-1</sup> ) | Bound (%) | Free (%) |             | Total activity<br>(nM min <sup>-1</sup> mL <sup>-1</sup> ) | Bound (%) | Free (%) |
| <b>bG</b>   | -                                                          | -         | -        | <b>bG</b>   | 51 ± 3                                                     | 100       | -        | <b>bG</b>   | 141 ± 5                                                    | 74        | 26       |
| <b>Pho</b>  | 276 ± 28                                                   | 89        | 11       | <b>Pho</b>  | 6683 ± 215                                                 | 61        | 39       | <b>Pho</b>  | 4375 ± 199                                                 | 78        | 22       |
| <b>Lip</b>  | 7327 ± 522                                                 | 75        | 25       | <b>Lip</b>  | 10544 ± 617                                                | 55        | 45       | <b>Lip</b>  | 8101 ± 529                                                 | 75        | 25       |
| <b>bM</b>   | -                                                          | -         | -        | <b>bM</b>   | -                                                          | -         | -        | <b>bM</b>   | -                                                          | -         | -        |
| <b>aA</b>   | -                                                          | -         | -        | <b>aA</b>   | -                                                          | -         | -        | <b>aA</b>   | -                                                          | -         | -        |
| <b>bX</b>   | -                                                          | -         | -        | <b>bX</b>   | -                                                          | -         | -        | <b>bX</b>   | -                                                          | -         | -        |
| <b>bGal</b> | -                                                          | -         | -        | <b>bGal</b> | -                                                          | -         | -        | <b>bGal</b> | -                                                          | -         | -        |
| <b>CBH</b>  | -                                                          | -         | -        | <b>CBH</b>  | -                                                          | -         | -        | <b>CBH</b>  | -                                                          | -         | -        |
| <b>aG</b>   | -                                                          | -         | -        | <b>aG</b>   | -                                                          | -         | -        | <b>aG</b>   | -                                                          | -         | -        |
| <b>ChTN</b> | -                                                          | -         | -        | <b>ChTN</b> | -                                                          | -         | -        | <b>ChTN</b> | -                                                          | -         | -        |
| <b>aGal</b> | -                                                          | -         | -        | <b>aGal</b> | -                                                          | -         | -        | <b>aGal</b> | -                                                          | -         | -        |
| <b>bGlu</b> | -                                                          | -         | -        | <b>bGlu</b> | -                                                          | -         | -        | <b>bGlu</b> | -                                                          | -         | -        |
|             | Enzymes produced (%)                                       |           | 16.7     |             | Enzymes produced (%)                                       |           | 25       |             | Enzymes produced (%)                                       |           | 25       |

| Strain:     | p16                                                        |           |          | Strain:     | p17                                                        |           |          | Strain:     | p18                                                        |           |          |
|-------------|------------------------------------------------------------|-----------|----------|-------------|------------------------------------------------------------|-----------|----------|-------------|------------------------------------------------------------|-----------|----------|
|             | Total activity<br>(nM min <sup>-1</sup> mL <sup>-1</sup> ) | Bound (%) | Free (%) |             | Total activity<br>(nM min <sup>-1</sup> mL <sup>-1</sup> ) | Bound (%) | Free (%) |             | Total activity<br>(nM min <sup>-1</sup> mL <sup>-1</sup> ) | Bound (%) | Free (%) |
| <b>bG</b>   | 289 ± 9                                                    | 49        | 51       | <b>bG</b>   | -                                                          | -         | -        | <b>bG</b>   | 153 ± 45                                                   | 83        | 17       |
| <b>Pho</b>  | 7558 ± 281                                                 | 55        | 45       | <b>Pho</b>  | 261 ± 17                                                   | 74        | 26       | <b>Pho</b>  | 7055 ± 355                                                 | 76        | 24       |
| <b>Lip</b>  | 9078 ± 509                                                 | 68        | 32       | <b>Lip</b>  | 10518 ± 273                                                | 55        | 45       | <b>Lip</b>  | 7990 ± 108                                                 | 82        | 18       |
| <b>bM</b>   | -                                                          | -         | -        | <b>bM</b>   | -                                                          | -         | -        | <b>bM</b>   | 10 ± 5                                                     | -         | 100      |
| <b>aA</b>   | -                                                          | -         | -        | <b>aA</b>   | -                                                          | -         | -        | <b>aA</b>   | 15 ± 4                                                     | -         | 100      |
| <b>bX</b>   | -                                                          | -         | -        | <b>bX</b>   | 19. ± 12                                                   | -         | 100      | <b>bX</b>   | -                                                          | -         | -        |
| <b>bGal</b> | -                                                          | -         | -        | <b>bGal</b> | -                                                          | -         | -        | <b>bGal</b> | 11 ± 1                                                     | -         | 100      |
| <b>CBH</b>  | -                                                          | -         | -        | <b>CBH</b>  | -                                                          | -         | -        | <b>CBH</b>  | -                                                          | -         | -        |
| <b>aG</b>   | -                                                          | -         | -        | <b>aG</b>   | 20 ± 20                                                    | -         | 100      | <b>aG</b>   | 15 ± 1                                                     | -         | 100      |
| <b>ChTN</b> | -                                                          | -         | -        | <b>ChTN</b> | -                                                          | -         | -        | <b>ChTN</b> | -                                                          | -         | -        |
| <b>aGal</b> | -                                                          | -         | -        | <b>aGal</b> | -                                                          | -         | -        | <b>aGal</b> | 18 ± 2                                                     | -         | 100      |
| <b>bGlu</b> | -                                                          | -         | -        | <b>bGlu</b> | -                                                          | -         | -        | <b>bGlu</b> | 11 ± 1                                                     | -         | 100      |
|             | Enzymes produced (%)                                       |           | 25       |             | Enzymes produced (%)                                       |           | 33.3     |             | Enzymes produced (%)                                       |           | 75       |
| Strain:     | p19                                                        |           |          | Strain:     | p20                                                        |           |          | Strain:     | p23                                                        |           |          |
|             | Total activity<br>(nM min <sup>-1</sup> mL <sup>-1</sup> ) | Bound (%) | Free (%) |             | Total activity<br>(nM min <sup>-1</sup> mL <sup>-1</sup> ) | Bound (%) | Free (%) |             | Total activity<br>(nM min <sup>-1</sup> mL <sup>-1</sup> ) | Bound (%) | Free (%) |
| <b>bG</b>   | -                                                          | -         | -        | <b>bG</b>   | 1306 ± 27                                                  | 71        | 29       | <b>bG</b>   | 1449 ± 26                                                  | 84        | 16       |
| <b>Pho</b>  | 1862 ± 55                                                  | 96        | 4        | <b>Pho</b>  | 8874 ± 127                                                 | 63        | 37       | <b>Pho</b>  | 5676 ± 37                                                  | 92        | 8        |
| <b>Lip</b>  | 8333 ± 157                                                 | 62        | 38       | <b>Lip</b>  | 8768 ± 325                                                 | 67        | 33       | <b>Lip</b>  | 7270 ± 431                                                 | 72        | 28       |
| <b>bM</b>   | -                                                          | -         | -        | <b>bM</b>   | 41 ± 5                                                     | -         | 100      | <b>bM</b>   | 150 ± 8                                                    | 8         | 92       |
| <b>aA</b>   | -                                                          | -         | -        | <b>aA</b>   | 39 ± 2                                                     | -         | 100      | <b>aA</b>   | 210 ± 9                                                    | -         | 100      |
| <b>bX</b>   | -                                                          | -         | -        | <b>bX</b>   | 91 ± 6                                                     | 42        | 58       | <b>bX</b>   | 151 ± 15                                                   | -         | 100      |
| <b>bGal</b> | -                                                          | -         | -        | <b>bGal</b> | 36 ± 3                                                     | -         | 100      | <b>bGal</b> | 164 ± 0                                                    | -         | 100      |
| <b>CBH</b>  | -                                                          | -         | -        | <b>CBH</b>  | 41 ± 3                                                     | -         | 100      | <b>CBH</b>  | 167 ± 25                                                   | 18        | 82       |
| <b>aG</b>   | -                                                          | -         | -        | <b>aG</b>   | 57 ± 4                                                     | 18        | 82       | <b>aG</b>   | 154 ± 28                                                   | -         | 100      |
| <b>ChTN</b> | -                                                          | -         | -        | <b>ChTN</b> | 39 ± 1                                                     | -         | 100      | <b>ChTN</b> | 148 ± 23                                                   | -         | 100      |
| <b>aGal</b> | -                                                          | -         | -        | <b>aGal</b> | 43 ± 1                                                     | -         | 100      | <b>aGal</b> | 169 ± 7                                                    | -         | 100      |
| <b>bGlu</b> | -                                                          | -         | -        | <b>bGlu</b> | 42 ± 1                                                     | -         | 100      | <b>bGlu</b> | 130 ± 11                                                   | -         | 100      |
|             | Enzymes produced (%)                                       |           | 16.7     |             | Enzymes produced (%)                                       |           | 100      |             | Enzymes produced (%)                                       |           | 100      |

| Strain:     | p24                                                        |           |             | Strain:     | p25                                                        |           |             | Strain:     | p30                                                        |           |             |
|-------------|------------------------------------------------------------|-----------|-------------|-------------|------------------------------------------------------------|-----------|-------------|-------------|------------------------------------------------------------|-----------|-------------|
|             | Total activity<br>(nM min <sup>-1</sup> mL <sup>-1</sup> ) | Bound (%) | Free (%)    |             | Total activity<br>(nM min <sup>-1</sup> mL <sup>-1</sup> ) | Bound (%) | Free (%)    |             | Total activity<br>(nM min <sup>-1</sup> mL <sup>-1</sup> ) | Bound (%) | Free (%)    |
| <b>bG</b>   | 602 ± 31                                                   | 67        | 33          | <b>bG</b>   | -                                                          | -         | -           | <b>bG</b>   | -                                                          | -         | -           |
| <b>Pho</b>  | 8586 ± 231                                                 | 67        | 33          | <b>Pho</b>  | 175 ± 7                                                    | 77        | 23          | <b>Pho</b>  | 210 ± 12                                                   | 83        | 17          |
| <b>Lip</b>  | 10074 ± 104                                                | 66        | 34          | <b>Lip</b>  | 9245 ± 179                                                 | 53        | 47          | <b>Lip</b>  | 9038 ± 166                                                 | 52        | 48          |
| <b>bM</b>   | -                                                          | -         | -           | <b>bM</b>   | -                                                          | -         | -           | <b>bM</b>   | -                                                          | -         | -           |
| <b>aA</b>   | -                                                          | -         | -           | <b>aA</b>   | -                                                          | -         | -           | <b>aA</b>   | -                                                          | -         | -           |
| <b>bX</b>   | 39 ± 3                                                     | 57        | 43          | <b>bX</b>   | -                                                          | -         | -           | <b>bX</b>   | -                                                          | -         | -           |
| <b>bGal</b> | -                                                          | -         | -           | <b>bGal</b> | -                                                          | -         | -           | <b>bGal</b> | -                                                          | -         | -           |
| <b>CBH</b>  | -                                                          | -         | -           | <b>CBH</b>  | -                                                          | -         | -           | <b>CBH</b>  | -                                                          | -         | -           |
| <b>aG</b>   | 11 ± 3                                                     | -         | 100         | <b>aG</b>   | -                                                          | -         | -           | <b>aG</b>   | -                                                          | -         | -           |
| <b>ChTN</b> | -                                                          | -         | -           | <b>ChTN</b> | -                                                          | -         | -           | <b>ChTN</b> | -                                                          | -         | -           |
| <b>aGal</b> | -                                                          | -         | -           | <b>aGal</b> | -                                                          | -         | -           | <b>aGal</b> | -                                                          | -         | -           |
| <b>bGlu</b> | -                                                          | -         | -           | <b>bGlu</b> | -                                                          | -         | -           | <b>bGlu</b> | -                                                          | -         | -           |
|             | <b>Enzymes produced (%)</b>                                |           | <b>41.7</b> |             | <b>Enzymes produced (%)</b>                                |           | <b>16.7</b> |             | <b>Enzymes produced (%)</b>                                |           | <b>16.7</b> |

| Strain:     | p31                                                        |           |             | Strain:     | p33                                                        |           |             | Strain:     | p34                                                        |           |            |
|-------------|------------------------------------------------------------|-----------|-------------|-------------|------------------------------------------------------------|-----------|-------------|-------------|------------------------------------------------------------|-----------|------------|
|             | Total activity<br>(nM min <sup>-1</sup> mL <sup>-1</sup> ) | Bound (%) | Free (%)    |             | Total activity<br>(nM min <sup>-1</sup> mL <sup>-1</sup> ) | Bound (%) | Free (%)    |             | Total activity<br>(nM min <sup>-1</sup> mL <sup>-1</sup> ) | Bound (%) | Free (%)   |
| <b>bG</b>   | -                                                          | -         | -           | <b>bG</b>   | -                                                          | -         | -           | <b>bG</b>   | 194 ± 9                                                    | 81        | 19         |
| <b>Pho</b>  | 234 ± 6                                                    | 75        | 25          | <b>Pho</b>  | 262 ± 7                                                    | 76        | 24          | <b>Pho</b>  | 5852 ± 134                                                 | 87        | 13         |
| <b>Lip</b>  | 10589 ± 350                                                | 46        | 54          | <b>Lip</b>  | 8217 ± 106                                                 | 66        | 34          | <b>Lip</b>  | 8680 ± 65                                                  | 75        | 25         |
| <b>bM</b>   | -                                                          | -         | -           | <b>bM</b>   | -                                                          | -         | -           | <b>bM</b>   | 21 ± 3                                                     | -         | 100        |
| <b>aA</b>   | -                                                          | -         | -           | <b>aA</b>   | -                                                          | -         | -           | <b>aA</b>   | 16 ± 3                                                     | -         | 100        |
| <b>bX</b>   | -                                                          | -         | -           | <b>bX</b>   | -                                                          | -         | -           | <b>bX</b>   | 20 ± 4                                                     | -         | 100        |
| <b>bGal</b> | -                                                          | -         | -           | <b>bGal</b> | -                                                          | -         | -           | <b>bGal</b> | 19 ± 1                                                     | -         | 100        |
| <b>CBH</b>  | -                                                          | -         | -           | <b>CBH</b>  | -                                                          | -         | -           | <b>CBH</b>  | 14 ± 1                                                     | -         | 100        |
| <b>aG</b>   | -                                                          | -         | -           | <b>aG</b>   | -                                                          | -         | -           | <b>aG</b>   | 23 ± 2                                                     | -         | 100        |
| <b>ChTN</b> | -                                                          | -         | -           | <b>ChTN</b> | -                                                          | -         | -           | <b>ChTN</b> | 14 ± 3                                                     | -         | 100        |
| <b>aGal</b> | -                                                          | -         | -           | <b>aGal</b> | -                                                          | -         | -           | <b>aGal</b> | 25 ± 6                                                     | -         | 100        |
| <b>bGlu</b> | -                                                          | -         | -           | <b>bGlu</b> | -                                                          | -         | -           | <b>bGlu</b> | 21 ± 5                                                     | -         | 100        |
|             | <b>Enzymes produced (%)</b>                                |           | <b>16.7</b> |             | <b>Enzymes produced (%)</b>                                |           | <b>16.7</b> |             | <b>Enzymes produced (%)</b>                                |           | <b>100</b> |

| Strain:     | p36                                                        |           |          | Strain:     | p37                                                        |           |          | Strain:     | p42                                                        |           |          |
|-------------|------------------------------------------------------------|-----------|----------|-------------|------------------------------------------------------------|-----------|----------|-------------|------------------------------------------------------------|-----------|----------|
|             | Total activity<br>(nM min <sup>-1</sup> mL <sup>-1</sup> ) | Bound (%) | Free (%) |             | Total activity<br>(nM min <sup>-1</sup> mL <sup>-1</sup> ) | Bound (%) | Free (%) |             | Total activity<br>(nM min <sup>-1</sup> mL <sup>-1</sup> ) | Bound (%) | Free (%) |
| <b>bG</b>   | -                                                          | -         | -        | <b>bG</b>   | -                                                          | -         | -        | <b>bG</b>   | -                                                          | -         | -        |
| <b>Pho</b>  | 274 ± 11                                                   | 82        | 18       | <b>Pho</b>  | 209 ± 16                                                   | 82        | 18       | <b>Pho</b>  | 287 ± 16                                                   | 90        | 10       |
| <b>Lip</b>  | 9420 ± 130                                                 | 56        | 44       | <b>Lip</b>  | 8519 ± 485                                                 | 55        | 45       | <b>Lip</b>  | 8321 ± 176                                                 | 69        | 31       |
| <b>bM</b>   | -                                                          | -         | -        | <b>bM</b>   | -                                                          | -         | -        | <b>bM</b>   | -                                                          | -         | -        |
| <b>aA</b>   | -                                                          | -         | -        | <b>aA</b>   | -                                                          | -         | -        | <b>aA</b>   | -                                                          | -         | -        |
| <b>bX</b>   | -                                                          | -         | -        | <b>bX</b>   | -                                                          | -         | -        | <b>bX</b>   | -                                                          | -         | -        |
| <b>bGal</b> | -                                                          | -         | -        | <b>bGal</b> | -                                                          | -         | -        | <b>bGal</b> | -                                                          | -         | -        |
| <b>CBH</b>  | -                                                          | -         | -        | <b>CBH</b>  | -                                                          | -         | -        | <b>CBH</b>  | -                                                          | -         | -        |
| <b>aG</b>   | -                                                          | -         | -        | <b>aG</b>   | -                                                          | -         | -        | <b>aG</b>   | -                                                          | -         | -        |
| <b>ChTN</b> | -                                                          | -         | -        | <b>ChTN</b> | -                                                          | -         | -        | <b>ChTN</b> | -                                                          | -         | -        |
| <b>aGal</b> | -                                                          | -         | -        | <b>aGal</b> | -                                                          | -         | -        | <b>aGal</b> | -                                                          | -         | -        |
| <b>bGlu</b> | -                                                          | -         | -        | <b>bGlu</b> | -                                                          | -         | -        | <b>bGlu</b> | -                                                          | -         | -        |
|             | Enzymes produced (%)                                       |           | 16.7     |             | Enzymes produced (%)                                       |           | 16.7     |             | Enzymes produced (%)                                       |           | 16.7     |
| Strain:     | p43                                                        |           |          | Strain:     | p44                                                        |           |          | Strain:     | p45                                                        |           |          |
|             | Total activity<br>(nM min <sup>-1</sup> mL <sup>-1</sup> ) | Bound (%) | Free (%) |             | Total activity<br>(nM min <sup>-1</sup> mL <sup>-1</sup> ) | Bound (%) | Free (%) |             | Total activity<br>(nM min <sup>-1</sup> mL <sup>-1</sup> ) | Bound (%) | Free (%) |
| <b>bG</b>   | -                                                          | -         | -        | <b>bG</b>   | -                                                          | -         | -        | <b>bG</b>   | -                                                          | -         | -        |
| <b>Pho</b>  | 430 ± 27                                                   | 88        | 12       | <b>Pho</b>  | 313 ± 15                                                   | 74        | 26       | <b>Pho</b>  | 343 ± 19                                                   | 75        | 25       |
| <b>Lip</b>  | 10696 ± 152                                                | 56        | 44       | <b>Lip</b>  | 10587 ± 360                                                | 49        | 51       | <b>Lip</b>  | 8891 ± 274                                                 | 66        | 34       |
| <b>bM</b>   | -                                                          | -         | -        | <b>bM</b>   | -                                                          | -         | -        | <b>bM</b>   | -                                                          | -         | -        |
| <b>aA</b>   | -                                                          | -         | -        | <b>aA</b>   | -                                                          | -         | -        | <b>aA</b>   | -                                                          | -         | -        |
| <b>bX</b>   | -                                                          | -         | -        | <b>bX</b>   | -                                                          | -         | -        | <b>bX</b>   | -                                                          | -         | -        |
| <b>bGal</b> | -                                                          | -         | -        | <b>bGal</b> | -                                                          | -         | -        | <b>bGal</b> | -                                                          | -         | -        |
| <b>CBH</b>  | -                                                          | -         | -        | <b>CBH</b>  | -                                                          | -         | -        | <b>CBH</b>  | -                                                          | -         | -        |
| <b>aG</b>   | -                                                          | -         | -        | <b>aG</b>   | -                                                          | -         | -        | <b>aG</b>   | -                                                          | -         | -        |
| <b>ChTN</b> | -                                                          | -         | -        | <b>ChTN</b> | -                                                          | -         | -        | <b>ChTN</b> | -                                                          | -         | -        |
| <b>aGal</b> | -                                                          | -         | -        | <b>aGal</b> | -                                                          | -         | -        | <b>aGal</b> | -                                                          | -         | -        |
| <b>bGlu</b> | -                                                          | -         | -        | <b>bGlu</b> | -                                                          | -         | -        | <b>bGlu</b> | -                                                          | -         | -        |
|             | Enzymes produced (%)                                       |           | 16.7     |             | Enzymes produced (%)                                       |           | 16.7     |             | Enzymes produced (%)                                       |           | 16.7     |

| Strain:     | p47                                                        |           |          | Strain:     | p48                                                        |           |          | Strain:     | p49                                                        |           |          |
|-------------|------------------------------------------------------------|-----------|----------|-------------|------------------------------------------------------------|-----------|----------|-------------|------------------------------------------------------------|-----------|----------|
|             | Total activity<br>(nM min <sup>-1</sup> mL <sup>-1</sup> ) | Bound (%) | Free (%) |             | Total activity<br>(nM min <sup>-1</sup> mL <sup>-1</sup> ) | Bound (%) | Free (%) |             | Total activity<br>(nM min <sup>-1</sup> mL <sup>-1</sup> ) | Bound (%) | Free (%) |
| <b>bG</b>   | 226 ± 9                                                    | 77        | 23       | <b>bG</b>   | -                                                          | -         | -        | <b>bG</b>   | 99 ± 3                                                     | 47        | 53       |
| <b>Pho</b>  | 6384 ± 132                                                 | 63        | 37       | <b>Pho</b>  | 327 ± 17                                                   | 77        | 23       | <b>Pho</b>  | 6534 ± 72                                                  | 76        | 24       |
| <b>Lip</b>  | 8911 ± 107                                                 | 66        | 34       | <b>Lip</b>  | 11059 ± 232                                                | 46        | 54       | <b>Lip</b>  | 9598 ± 175                                                 | 67        | 33       |
| <b>bM</b>   | -                                                          | -         | -        | <b>bM</b>   | -                                                          | -         | -        | <b>bM</b>   | 41 ± 9                                                     | -         | 100      |
| <b>aA</b>   | -                                                          | -         | -        | <b>aA</b>   | -                                                          | -         | -        | <b>aA</b>   | 28 ± 2                                                     | -         | 100      |
| <b>bX</b>   | -                                                          | -         | -        | <b>bX</b>   | -                                                          | -         | -        | <b>bX</b>   | 40 ± 2                                                     | -         | 100      |
| <b>bGal</b> | -                                                          | -         | -        | <b>bGal</b> | -                                                          | -         | -        | <b>bGal</b> | 32 ± 4                                                     | -         | 100      |
| <b>CBH</b>  | -                                                          | -         | -        | <b>CBH</b>  | -                                                          | -         | -        | <b>CBH</b>  | 39 ± 5                                                     | -         | 100      |
| <b>aG</b>   | -                                                          | -         | -        | <b>aG</b>   | -                                                          | -         | -        | <b>aG</b>   | 32 ± 4                                                     | -         | 100      |
| <b>ChTN</b> | -                                                          | -         | -        | <b>ChTN</b> | -                                                          | -         | -        | <b>ChTN</b> | 29 ± 4                                                     | -         | 100      |
| <b>aGal</b> | -                                                          | -         | -        | <b>aGal</b> | -                                                          | -         | -        | <b>aGal</b> | 30 ± 7                                                     | -         | 100      |
| <b>bGlu</b> | -                                                          | -         | -        | <b>bGlu</b> | -                                                          | -         | -        | <b>bGlu</b> | 39 ± 2                                                     | -         | 100      |
|             | Enzymes produced (%)                                       |           | 25       |             | Enzymes produced (%)                                       |           | 16.7     |             | Enzymes produced (%)                                       |           | 100      |

  

| Strain:     | p50                                                        |           |          | Strain:     | p51                                                        |           |          | Strain:     | p52                                                        |           |          |
|-------------|------------------------------------------------------------|-----------|----------|-------------|------------------------------------------------------------|-----------|----------|-------------|------------------------------------------------------------|-----------|----------|
|             | Total activity<br>(nM min <sup>-1</sup> mL <sup>-1</sup> ) | Bound (%) | Free (%) |             | Total activity<br>(nM min <sup>-1</sup> mL <sup>-1</sup> ) | Bound (%) | Free (%) |             | Total activity<br>(nM min <sup>-1</sup> mL <sup>-1</sup> ) | Bound (%) | Free (%) |
| <b>bG</b>   | 335 ± 9                                                    | 50        | 50       | <b>bG</b>   | 59 ± 5                                                     | 100       | -        | <b>bG</b>   | 113 ± 11                                                   | 100       | -        |
| <b>Pho</b>  | 8027 ± 253                                                 | 63        | 37       | <b>Pho</b>  | 6769 ± 128                                                 | 76        | 24       | <b>Pho</b>  | 7756 ± 174                                                 | 72        | 28       |
| <b>Lip</b>  | 8534 ± 169                                                 | 71        | 29       | <b>Lip</b>  | 6985 ± 47                                                  | 73        | 27       | <b>Lip</b>  | 7292 ± 193                                                 | 80        | 20       |
| <b>bM</b>   | -                                                          | -         | -        | <b>bM</b>   | -                                                          | -         | -        | <b>bM</b>   | -                                                          | -         | -        |
| <b>aA</b>   | -                                                          | -         | -        | <b>aA</b>   | -                                                          | -         | -        | <b>aA</b>   | -                                                          | -         | -        |
| <b>bX</b>   | -                                                          | -         | -        | <b>bX</b>   | -                                                          | -         | -        | <b>bX</b>   | -                                                          | -         | -        |
| <b>bGal</b> | -                                                          | -         | -        | <b>bGal</b> | -                                                          | -         | -        | <b>bGal</b> | -                                                          | -         | -        |
| <b>CBH</b>  | -                                                          | -         | -        | <b>CBH</b>  | -                                                          | -         | -        | <b>CBH</b>  | -                                                          | -         | -        |
| <b>aG</b>   | -                                                          | -         | -        | <b>aG</b>   | -                                                          | -         | -        | <b>aG</b>   | -                                                          | -         | -        |
| <b>ChTN</b> | -                                                          | -         | -        | <b>ChTN</b> | -                                                          | -         | -        | <b>ChTN</b> | -                                                          | -         | -        |
| <b>aGal</b> | -                                                          | -         | -        | <b>aGal</b> | -                                                          | -         | -        | <b>aGal</b> | -                                                          | -         | -        |
| <b>bGlu</b> | -                                                          | -         | -        | <b>bGlu</b> | -                                                          | -         | -        | <b>bGlu</b> | -                                                          | -         | -        |
|             | Enzymes produced (%)                                       |           | 25       |             | Enzymes produced (%)                                       |           | 25       |             | Enzymes produced (%)                                       |           | 25       |

| Strain:     | p53                                                        |           |             | Strain:     | p54                                                        |           |            | Strain:     | p55                                                        |           |             |
|-------------|------------------------------------------------------------|-----------|-------------|-------------|------------------------------------------------------------|-----------|------------|-------------|------------------------------------------------------------|-----------|-------------|
|             | Total activity<br>(nM min <sup>-1</sup> mL <sup>-1</sup> ) | Bound (%) | Free (%)    |             | Total activity<br>(nM min <sup>-1</sup> mL <sup>-1</sup> ) | Bound (%) | Free (%)   |             | Total activity<br>(nM min <sup>-1</sup> mL <sup>-1</sup> ) | Bound (%) | Free (%)    |
| <b>bG</b>   | -                                                          | -         | -           | <b>bG</b>   | 21 ± 3                                                     | -         | 100        | <b>bG</b>   | -                                                          | -         | -           |
| <b>Pho</b>  | 4719 ± 217                                                 | 98        | 2           | <b>Pho</b>  | 5460 ± 106                                                 | 98        | 2          | <b>Pho</b>  | 2468 ± 332                                                 | 99        | 1           |
| <b>Lip</b>  | 8094 ± 365                                                 | 66        | 34          | <b>Lip</b>  | 7650 ± 241                                                 | 80        | 20         | <b>Lip</b>  | 7899 ± 468                                                 | 66        | 34          |
| <b>bM</b>   | -                                                          | -         | -           | <b>bM</b>   | 29 ± 3                                                     | -         | 100        | <b>bM</b>   | -                                                          | -         | -           |
| <b>aA</b>   | -                                                          | -         | -           | <b>aA</b>   | 21 ± 3                                                     | -         | 100        | <b>aA</b>   | -                                                          | -         | -           |
| <b>bX</b>   | -                                                          | -         | -           | <b>bX</b>   | 25 ± 1                                                     | -         | 100        | <b>bX</b>   | -                                                          | -         | -           |
| <b>bGal</b> | -                                                          | -         | -           | <b>bGal</b> | 22 ± 3                                                     | -         | 100        | <b>bGal</b> | -                                                          | -         | -           |
| <b>CBH</b>  | -                                                          | -         | -           | <b>CBH</b>  | 20 ± 3                                                     | -         | 100        | <b>CBH</b>  | -                                                          | -         | -           |
| <b>aG</b>   | -                                                          | -         | -           | <b>aG</b>   | 31 ± 2                                                     | -         | 100        | <b>aG</b>   | -                                                          | -         | -           |
| <b>ChTN</b> | -                                                          | -         | -           | <b>ChTN</b> | 23 ± 2                                                     | -         | 100        | <b>ChTN</b> | -                                                          | -         | -           |
| <b>aGal</b> | -                                                          | -         | -           | <b>aGal</b> | 31 ± 3                                                     | -         | 100        | <b>aGal</b> | -                                                          | -         | -           |
| <b>bGlu</b> | -                                                          | -         | -           | <b>bGlu</b> | 28 ± 4                                                     | -         | 100        | <b>bGlu</b> | -                                                          | -         | -           |
|             | <b>Enzymes produced (%)</b>                                |           | <b>16.7</b> |             | <b>Enzymes produced (%)</b>                                |           | <b>100</b> |             | <b>Enzymes produced (%)</b>                                |           | <b>16.7</b> |
| Strain:     | p56                                                        |           |             | Strain:     | p57                                                        |           |            | Strain:     | p60                                                        |           |             |
|             | Total activity<br>(nM min <sup>-1</sup> mL <sup>-1</sup> ) | Bound (%) | Free (%)    |             | Total activity<br>(nM min <sup>-1</sup> mL <sup>-1</sup> ) | Bound (%) | Free (%)   |             | Total activity<br>(nM min <sup>-1</sup> mL <sup>-1</sup> ) | Bound (%) | Free (%)    |
| <b>bG</b>   | -                                                          | -         | -           | <b>bG</b>   | 46 ± 7                                                     | 63        | 37         | <b>bG</b>   | -                                                          | -         | -           |
| <b>Pho</b>  | 253 ± 16                                                   | 90        | 10          | <b>Pho</b>  | 4855 ± 154                                                 | 42        | 58         | <b>Pho</b>  | 5468 ± 258                                                 | 98        | 2           |
| <b>Lip</b>  | 9641 ± 616                                                 | 51        | 49          | <b>Lip</b>  | 7765 ± 86                                                  | 50        | 50         | <b>Lip</b>  | 6737 ± 697                                                 | 77        | 23          |
| <b>bM</b>   | -                                                          | -         | -           | <b>bM</b>   | -                                                          | -         | -          | <b>bM</b>   | -                                                          | -         | -           |
| <b>aA</b>   | -                                                          | -         | -           | <b>aA</b>   | -                                                          | -         | -          | <b>aA</b>   | 11 ± 4                                                     | -         | 100         |
| <b>bX</b>   | -                                                          | -         | -           | <b>bX</b>   | -                                                          | -         | -          | <b>bX</b>   | -                                                          | -         | -           |
| <b>bGal</b> | -                                                          | -         | -           | <b>bGal</b> | -                                                          | -         | -          | <b>bGal</b> | -                                                          | -         | -           |
| <b>CBH</b>  | -                                                          | -         | -           | <b>CBH</b>  | -                                                          | -         | -          | <b>CBH</b>  | -                                                          | -         | -           |
| <b>aG</b>   | -                                                          | -         | -           | <b>aG</b>   | -                                                          | -         | -          | <b>aG</b>   | -                                                          | -         | -           |
| <b>ChTN</b> | -                                                          | -         | -           | <b>ChTN</b> | -                                                          | -         | -          | <b>ChTN</b> | -                                                          | -         | -           |
| <b>aGal</b> | -                                                          | -         | -           | <b>aGal</b> | -                                                          | -         | -          | <b>aGal</b> | -                                                          | -         | -           |
| <b>bGlu</b> | -                                                          | -         | -           | <b>bGlu</b> | -                                                          | -         | -          | <b>bGlu</b> | -                                                          | -         | -           |
|             | <b>Enzymes produced (%)</b>                                |           | <b>16.7</b> |             | <b>Enzymes produced (%)</b>                                |           | <b>25</b>  |             | <b>Enzymes produced (%)</b>                                |           | <b>25</b>   |

| Strain:     | p61                                                        |           |             | Strain:     | p62                                                        |           |           |
|-------------|------------------------------------------------------------|-----------|-------------|-------------|------------------------------------------------------------|-----------|-----------|
|             | Total activity<br>(nM min <sup>-1</sup> mL <sup>-1</sup> ) | Bound (%) | Free (%)    |             | Total activity<br>(nM min <sup>-1</sup> mL <sup>-1</sup> ) | Bound (%) | Free (%)  |
| <b>bG</b>   | -                                                          | -         | -           | <b>bG</b>   | 55 ± 1                                                     | 100       | -         |
| <b>Pho</b>  | 3688 ± 199                                                 | 99        | 1           | <b>Pho</b>  | 5583 ± 90                                                  | 69        | 31        |
| <b>Lip</b>  | 9970 ± 641                                                 | 56        | 44          | <b>Lip</b>  | 7709 ± 345                                                 | 75        | 25        |
| <b>bM</b>   | -                                                          | -         | -           | <b>bM</b>   | -                                                          | -         | -         |
| <b>aA</b>   | -                                                          | -         | -           | <b>aA</b>   | -                                                          | -         | -         |
| <b>bX</b>   | -                                                          | -         | -           | <b>bX</b>   | -                                                          | -         | -         |
| <b>bGal</b> | -                                                          | -         | -           | <b>bGal</b> | -                                                          | -         | -         |
| <b>CBH</b>  | -                                                          | -         | -           | <b>CBH</b>  | -                                                          | -         | -         |
| <b>aG</b>   | -                                                          | -         | -           | <b>aG</b>   | -                                                          | -         | -         |
| <b>ChTN</b> | -                                                          | -         | -           | <b>ChTN</b> | -                                                          | -         | -         |
| <b>aGal</b> | -                                                          | -         | -           | <b>aGal</b> | -                                                          | -         | -         |
| <b>bGlu</b> | -                                                          | -         | -           | <b>bGlu</b> | -                                                          | -         | -         |
|             | <b>Enzymes produced (%)</b>                                |           | <b>16.7</b> |             | <b>Enzymes produced (%)</b>                                |           | <b>25</b> |
