# Supplementary material for: Bacteria from the endosphere and rhizosphere of Quercus spp. use mainly cell wall-associated enzymes to decompose organic matter
Source: PubMed Central journal article supplement (PMC6433265; doi:10.1371/journal.pone.0214422), 2019-03-25
Supplement: pone.0214422.s006.pdf [file pone.0214422.s006.pdf]

**S6 Table. Activity of cell-bound and freely-released enzymes, and total enzymatic activity of strains of genus *Arthrobacter*.** Data represent means and standard deviations of the total activity of three replicates. Abbreviations of enzymes: **bG**:  $\beta$ -glucosidase; **Pho**: acid phosphatase; **Lip**: lipase; **bM**:  $\beta$ -mannosidase; **aA**:  $\alpha$ -arabinosidase; **bX**:  $\beta$ -xylosidase; **bGal**:  $\beta$ -galactosidase; **CBH**: cellobiohydrolase; **aG**:  $\alpha$ -glucosidase; **ChTN**: chitinase; **aGal**:  $\alpha$ -galactosidase; **bGlu**:  $\beta$ -glucuronidase. A ‘-’ indicates values below detection limit.

| Strain:     | AFG3.2                                                     |           |          | Strain:     | AFG7.2                                                     |           |          | Strain:     | AFG8                                                       |           |          |
|-------------|------------------------------------------------------------|-----------|----------|-------------|------------------------------------------------------------|-----------|----------|-------------|------------------------------------------------------------|-----------|----------|
|             | Total activity<br>(nM min <sup>-1</sup> mL <sup>-1</sup> ) | Bound (%) | Free (%) |             | Total activity<br>(nM min <sup>-1</sup> mL <sup>-1</sup> ) | Bound (%) | Free (%) |             | Total activity<br>(nM min <sup>-1</sup> mL <sup>-1</sup> ) | Bound (%) | Free (%) |
| <b>bG</b>   | 20 ± 0                                                     | -         | 100      | <b>bG</b>   | -                                                          | -         | -        | <b>bG</b>   | -                                                          | -         | -        |
| <b>Pho</b>  | 20 ± 2                                                     | 100       | -        | <b>Pho</b>  | 148 ± 11                                                   | 100       | -        | <b>Pho</b>  | 27 ± 8                                                     | 100       | -        |
| <b>Lip</b>  | 906 ± 37                                                   | 5         | 95       | <b>Lip</b>  | 503 ± 26                                                   | 63        | 37       | <b>Lip</b>  | 1124 ± 62                                                  | 33        | 67       |
| <b>bM</b>   | -                                                          | -         | -        | <b>bM</b>   | -                                                          | -         | -        | <b>bM</b>   | -                                                          | -         | -        |
| <b>aA</b>   | -                                                          | -         | -        | <b>aA</b>   | -                                                          | -         | -        | <b>aA</b>   | -                                                          | -         | -        |
| <b>bX</b>   | -                                                          | -         | -        | <b>bX</b>   | 28 ± 2                                                     | -         | 100      | <b>bX</b>   | -                                                          | -         | -        |
| <b>bGal</b> | -                                                          | -         | -        | <b>bGal</b> | 286 ± 8                                                    | -         | 100      | <b>bGal</b> | 96 ± 7                                                     | -         | 100      |
| <b>CBH</b>  | -                                                          | -         | -        | <b>CBH</b>  | -                                                          | -         | -        | <b>CBH</b>  | -                                                          | -         | -        |
| <b>aG</b>   | -                                                          | -         | -        | <b>aG</b>   | -                                                          | -         | -        | <b>aG</b>   | 15 ± 2                                                     | -         | 100      |
| <b>ChTN</b> | -                                                          | -         | -        | <b>ChTN</b> | -                                                          | -         | -        | <b>ChTN</b> | 64 ± 2                                                     | 100       | -        |
| <b>aGal</b> | -                                                          | -         | -        | <b>aGal</b> | -                                                          | -         | -        | <b>aGal</b> | 12 ± 1                                                     | -         | 100      |
| <b>bGlu</b> | 400 ± 18                                                   | -         | 100      | <b>bGlu</b> | 39 ± 9                                                     | -         | 100      | <b>bGlu</b> | 29 ± 6                                                     | -         | 100      |
|             | Enzymes produced (%)                                       |           | 33.3     |             | Enzymes produced (%)                                       |           | 41.7     |             | Enzymes produced (%)                                       |           | 58.3     |
| Strain:     | AFG15.2                                                    |           |          | Strain:     | AFG16.1                                                    |           |          | Strain:     | AFG17                                                      |           |          |
|             | Total activity<br>(nM min <sup>-1</sup> mL <sup>-1</sup> ) | Bound (%) | Free (%) |             | Total activity<br>(nM min <sup>-1</sup> mL <sup>-1</sup> ) | Bound (%) | Free (%) |             | Total activity<br>(nM min <sup>-1</sup> mL <sup>-1</sup> ) | Bound (%) | Free (%) |
| <b>bG</b>   | 18 ± 1                                                     | 100       | -        | <b>bG</b>   | -                                                          | -         | -        | <b>bG</b>   | -                                                          | -         | -        |
| <b>Pho</b>  | 251 ± 16                                                   | 100       | -        | <b>Pho</b>  | 50 ± 8                                                     | 44        | 56       | <b>Pho</b>  | 52 ± 5                                                     | 71        | 29       |
| <b>Lip</b>  | 1289 ± 63                                                  | 95        | 5        | <b>Lip</b>  | 1159 ± 60                                                  | 31        | 69       | <b>Lip</b>  | 535 ± 24                                                   | 65        | 35       |
| <b>bM</b>   | -                                                          | -         | -        | <b>bM</b>   | -                                                          | -         | -        | <b>bM</b>   | -                                                          | -         | -        |
| <b>aA</b>   | 15 ± 0                                                     | 100       | -        | <b>aA</b>   | -                                                          | -         | -        | <b>aA</b>   | -                                                          | -         | -        |
| <b>bX</b>   | 11 ± 1                                                     | 100       | -        | <b>bX</b>   | -                                                          | -         | -        | <b>bX</b>   | -                                                          | -         | -        |
| <b>bGal</b> | 122 ± 3                                                    | 89        | 11       | <b>bGal</b> | 101 ± 7                                                    | -         | 100      | <b>bGal</b> | 63 ± 1                                                     | -         | 100      |
| <b>CBH</b>  | -                                                          | -         | -        | <b>CBH</b>  | -                                                          | -         | -        | <b>CBH</b>  | -                                                          | -         | -        |
| <b>aG</b>   | -                                                          | -         | -        | <b>aG</b>   | -                                                          | -         | -        | <b>aG</b>   | -                                                          | -         | -        |
| <b>ChTN</b> | -                                                          | -         | -        | <b>ChTN</b> | 54 ± 5                                                     | 100       | -        | <b>ChTN</b> | -                                                          | -         | -        |
| <b>aGal</b> | 17 ± 1                                                     | -         | 100      | <b>aGal</b> | -                                                          | -         | -        | <b>aGal</b> | -                                                          | -         | -        |
| <b>bGlu</b> | -                                                          | -         | -        | <b>bGlu</b> | 17 ± 1                                                     | -         | 100      | <b>bGlu</b> | -                                                          | -         | -        |
|             | Enzymes produced (%)                                       |           | 58.3     |             | Enzymes produced (%)                                       |           | 41.7     |             | Enzymes produced (%)                                       |           | 25       |

| Strain: | AFG17.2                                                    |           |          | Strain: | AFG19.3                                                    |           |          | Strain: | AFG20                                                      |           |          |
|---------|------------------------------------------------------------|-----------|----------|---------|------------------------------------------------------------|-----------|----------|---------|------------------------------------------------------------|-----------|----------|
|         | Total activity<br>(nM min <sup>-1</sup> mL <sup>-1</sup> ) | Bound (%) | Free (%) |         | Total activity<br>(nM min <sup>-1</sup> mL <sup>-1</sup> ) | Bound (%) | Free (%) |         | Total activity<br>(nM min <sup>-1</sup> mL <sup>-1</sup> ) | Bound (%) | Free (%) |
| bG      | -                                                          | -         | -        | bG      | -                                                          | -         | -        | bG      | -                                                          | -         | -        |
| Pho     | 21 ± 6                                                     | 100       | -        | Pho     | 29 ± 7                                                     | 100       | -        | Pho     | -                                                          | -         | -        |
| Lip     | 168 ± 33                                                   | 49        | 51       | Lip     | 276 ± 34                                                   | 39        | 61       | Lip     | 238 ± 1                                                    | 46        | 54       |
| bM      | -                                                          | -         | -        | bM      | -                                                          | -         | -        | bM      | -                                                          | -         | -        |
| aA      | -                                                          | -         | -        | aA      | -                                                          | -         | -        | aA      | -                                                          | -         | -        |
| bX      | -                                                          | -         | -        | bX      | -                                                          | -         | -        | bX      | -                                                          | -         | -        |
| bGal    | -                                                          | -         | -        | bGal    | 95 ± 3                                                     | 49        | 51       | bGal    | -                                                          | -         | -        |
| CBH     | -                                                          | -         | -        | CBH     | -                                                          | -         | -        | CBH     | -                                                          | -         | -        |
| aG      | 12 ± 1                                                     | -         | 100      | aG      | 22 ± 2                                                     | -         | 100      | aG      | -                                                          | -         | -        |
| ChTN    | -                                                          | -         | -        | ChTN    | -                                                          | -         | -        | ChTN    | -                                                          | -         | -        |
| aGal    | -                                                          | -         | -        | aGal    | -                                                          | -         | -        | aGal    | -                                                          | -         | -        |
| bGlu    | -                                                          | -         | -        | bGlu    | -                                                          | -         | -        | bGlu    | -                                                          | -         | -        |
|         | Enzymes produced (%)                                       |           | 25       |         | Enzymes produced (%)                                       |           | 33.3     |         | Enzymes produced (%)                                       |           | 8.3      |
| Strain: | AFG20.1                                                    |           |          | Strain: | AFG22                                                      |           |          | Strain: | AFG27.1                                                    |           |          |
|         | Total activity<br>(nM min <sup>-1</sup> mL <sup>-1</sup> ) | Bound (%) | Free (%) |         | Total activity<br>(nM min <sup>-1</sup> mL <sup>-1</sup> ) | Bound (%) | Free (%) |         | Total activity<br>(nM min <sup>-1</sup> mL <sup>-1</sup> ) | Bound (%) | Free (%) |
| bG      | -                                                          | -         | -        | bG      | 43 ± 3                                                     | -         | 100      | bG      | -                                                          | -         | -        |
| Pho     | 10 ± 2                                                     | 100       | -        | Pho     | 19 ± 2                                                     | 100       | -        | Pho     | 38 ± 4                                                     | 100       | -        |
| Lip     | 187 ± 32                                                   | 54        | 46       | Lip     | 754 ± 121                                                  | 65        | 35       | Lip     | 349 ± 23                                                   | 38        | 62       |
| bM      | -                                                          | -         | -        | bM      | -                                                          | -         | -        | bM      | -                                                          | -         | -        |
| aA      | 13 ± 4                                                     | 100       | -        | aA      | -                                                          | -         | -        | aA      | -                                                          | -         | -        |
| bX      | -                                                          | -         | -        | bX      | -                                                          | -         | -        | bX      | -                                                          | -         | -        |
| bGal    | 403 ± 27                                                   | 97        | 3        | bGal    | 13 ± 2                                                     | -         | 100      | bGal    | 235 ± 14                                                   | 88        | 12       |
| CBH     | -                                                          | -         | -        | CBH     | -                                                          | -         | -        | CBH     | -                                                          | -         | -        |
| aG      | -                                                          | -         | -        | aG      | -                                                          | -         | -        | aG      | 215 ± 4                                                    | -         | 100      |
| ChTN    | -                                                          | -         | -        | ChTN    | 83 ± 3                                                     | 85        | 15       | ChTN    | -                                                          | -         | -        |
| aGal    | -                                                          | -         | -        | aGal    | -                                                          | -         | -        | aGal    | -                                                          | -         | -        |
| bGlu    | -                                                          | -         | -        | bGlu    | 24 ± 4                                                     | -         | 100      | bGlu    | 12 ± 0                                                     | -         | 100      |
|         | Enzymes produced (%)                                       |           | 33.33    |         | Enzymes produced (%)                                       |           | 50       |         | Enzymes produced (%)                                       |           | 41.7     |
